# Supplementary material
Source: PubMed Central journal article supplement (PMC2597437)

## Supplemental Figure Legends

**Fig. 1. Foxp3 and ROR $\gamma$ t expression in cytokine-stimulated and lamina propria CD4<sup>+</sup> T cells.** **a**, Naïve CD4<sup>+</sup> T cells were stimulated with anti-CD3/CD28 in the presence of the indicated cytokines for 48 hours, and were then stained with anti-ROR $\gamma$  (red) and anti-Foxp3 (green) mAbs. **b**, CD4<sup>+</sup>GFP<sup>int</sup> and CD4<sup>+</sup>GFP<sup>-</sup> lamina propria T cells were isolated from the gut of *RORc*( $\gamma$ t)<sup>+/*gfp*</sup> mice as in Fig. 1b. Sorted cells were stained with anti-ROR $\gamma$  (red) and anti-Foxp3 (green) mAbs as well as DAPI (blue nuclear staining, omitted in the corner panels). In the GFP<sup>-</sup> T cell fraction, rare ROR $\gamma$ <sup>+</sup> cells are present that do not express Foxp3. In the GFP<sup>int</sup> fraction, Foxp3<sup>+</sup>ROR $\gamma$ <sup>+</sup> cells (white arrowheads) can be detected. Representative data from two experiments are shown.

**Fig. 2. Th17 cells express Foxp3 during development in vivo.** Total small intestinal lamina propria cells were isolated from *Rosa26*<sup>stop-YFP/+</sup>; *Foxp3*<sup>cre/+</sup> female mice. Cells were stimulated with PMA/ionomycin in the presence of GolgiStop, and labelled with antibodies specific for cell surface markers. These were then divided into 2 fractions, and fixed/permeabilized with BD fix/perm for intracellular cytokine staining (**a** and **c**), or eBioscience fix/perm for intranuclear Foxp3 staining (**b**). Intranuclear staining for Foxp3 was performed in a separate tube because this procedure results in loss of YFP protein. The numbers in red indicate the percentage of TCR $\beta$ <sup>+</sup>CD4<sup>+</sup> cells that are YFP, Foxp3 or IL-17 positive. **a**, YFP expression in both TCR $\beta$ <sup>+</sup>CD4<sup>+</sup> and TCR $\beta$ <sup>+</sup>CD8<sup>+</sup> cells. **b**, TCR $\beta$ <sup>+</sup>Foxp3<sup>+</sup> cells in the lamina propria are CD4<sup>+</sup> and not CD8<sup>+</sup>. **c**, IL-17-expressing TCR $\beta$ <sup>+</sup>CD4<sup>+</sup>, but not TCR $\beta$ <sup>+</sup>CD4<sup>-</sup> cells, have switched on YFP. Littermate male control

mice (*Rosa26<sup>stop-YFP/+</sup>; Foxp3<sup>+Y</sup>*) have no YFP expression (data not shown).

Representative data from two experiments are shown.

**Fig. 3. An shRNA against Foxp3 alleviates the inhibition by TGF- $\beta$  of ROR $\gamma$ t-directed IL-17 production.** IL-17 production was measured by intracellular staining in retrovirally-transduced naïve CD4<sup>+</sup> T cells cultured in the absence or presence of TGF- $\beta$ . Cells co-transduced with control MCD2 or ROR $\gamma$ t (hCD2 reporter) and shRNA vectors LMP or LMP1066 (GFP reporter) were gated for GFP expression level and IL-17 expression levels were examined within each population. Representative data from three experiments are shown.

**Fig. 4. Interaction of Foxp3 and ROR $\gamma$ t in co-transfected cells.** HeLa cells were transfected with the indicated constructs and localization of ectopically expressed proteins was examined by confocal microscopy. ROR $\gamma$ t facilitates nuclear translocation of FKH-deficient Foxp3 only if the Foxp3 exon 2 sequence is intact. The scale bar is 20  $\mu$ m.

**Fig. 5. Human FOXP3 inhibits ROR $\gamma$ t-directed IL-17 expression.** Naïve CD4<sup>+</sup> T cells were co-transduced with retroviruses encoding murine ROR $\gamma$ t (MIT vector, Thy1.1 reporter) and various human FOXP3 constructs (MIG vector, GFP reporter). IL-17 expression was assessed on day 4 in cells gated for expression of both Thy1.1 and GFP. Representative data from three experiments are shown.

**Fig. 6. Foxp3 $\Delta$ Ex2 suppresses expression of IL-2 and IFN $\gamma$  in mouse CD4<sup>+</sup> T cells.**

Naïve CD4<sup>+</sup> T cells were transduced with retroviral constructs encoding MSCV-IRES-GFP (MIG), WT Foxp3-IRES-GFP (Foxp3 WT), or Foxp3 $\Delta$ exon2 -IRES-GFP (Foxp3 $\Delta$ Ex2). IL-2 and IFN $\gamma$  expression were measured by intracellular staining 48 hours after transduction. Representative data from at least three experiments are shown.

**Fig 7. IL-23 enhances the level of IL-17 expression at low concentrations of TGF- $\beta$ .**

**a**, IL-23 enhancement of Th17 cell differentiation at low concentrations of TGF- $\beta$ . IL-17 expression was examined by intracellular staining in naïve CD4<sup>+</sup> T cells after 96 hours of stimulation with the indicated cytokines. The numbers above and below bracket lines in each histogram indicate percent IL-17<sup>+</sup> cells in the presence or absence of IL-23, respectively (blue or red). **b**, Naïve CD4<sup>+</sup> T cells were stimulated with the indicated cytokines for 96 hours, and mean fluorescence of intensity (MFI) of IL-17<sup>+</sup> cells in the indicated cytokine conditions was examined by flow cytometry.

**Fig. 8. IL-23/IL-23R signaling inhibits TGF- $\beta$ -induced Foxp3 expression. a**, Naïve

CD4<sup>+</sup> T cells were transduced with MIG or IL-23R viruses and treated with different cytokines. On day 5 (96 h after adding the indicated cytokines), Foxp3 expression was measured by intracellular staining. **b**, Levels of Foxp3 mRNA after treatment with IL-6 or IL-23. Viral transduction was done exactly as in (a). On day 3 (48 h after adding the indicated cytokines), RNA from transduced GFP<sup>+</sup> cells was isolated. Foxp3 expression was measured by real-time RT-PCR and was normalized to the actin expression level.

Error bars represent standard deviation obtained using the standard curve method.

Representative data from at least three experiments are shown.

**Fig. 9. Foxp3 and IL-17 co-expression in CD4<sup>+</sup> T cells stimulated with IL-6 + TGF- $\beta$**

**correlates with inhibition of Foxp3 suppressive activity by IL-6 or IL-21. a,** Naïve

CFSE-labeled CD4<sup>+</sup> T cells were stimulated with anti-CD3/CD28 and exogenous hIL-2

in the presence of IL-6 + TGF- $\beta$  for the indicated times. CFSE dilution is shown and

cells were gated based on IL-17 or Foxp3 expression. **b,** Naïve CD4<sup>+</sup> T cells were co-

transduced as in Fig.3d. After transduction, cells were stimulated with or without IL-6 or

IL-21. IL-17 expression was assessed on day 4 in cells gated for expression of both

Thy1.1 and GFP. The level of retrovirally transduced-Foxp3 protein and proportion of

Foxp3<sup>+</sup> cells were similar in the presence or absence of IL-6 or IL-21, as determined by

intracellular staining (data not shown). Representative data from three experiments are

shown.

**Fig. 10. TGF- $\beta$  concentration governs the Th17:Treg choice.** TGF- $\beta$  induces the

expression of both Foxp3 and ROR $\gamma$ t in naïve CD4<sup>+</sup> T cells, but the function of ROR $\gamma$ t is

inhibited by Foxp3. Maximal expression of IL-23R is induced synergistically by low

concentrations of TGF- $\beta$ , together with proinflammatory cytokines (IL-6/IL-21/IL-23),

which inhibit the expression and activity of Foxp3 and therefore favor Th17 cell

differentiation. Maximal expression of Foxp3 is induced by high concentrations of TGF-

$\beta$ , which inhibits IL-23R, IL-22, and possibly IL-17 expression and therefore promotes

Treg cell differentiation.



# Supplementary Figure 1

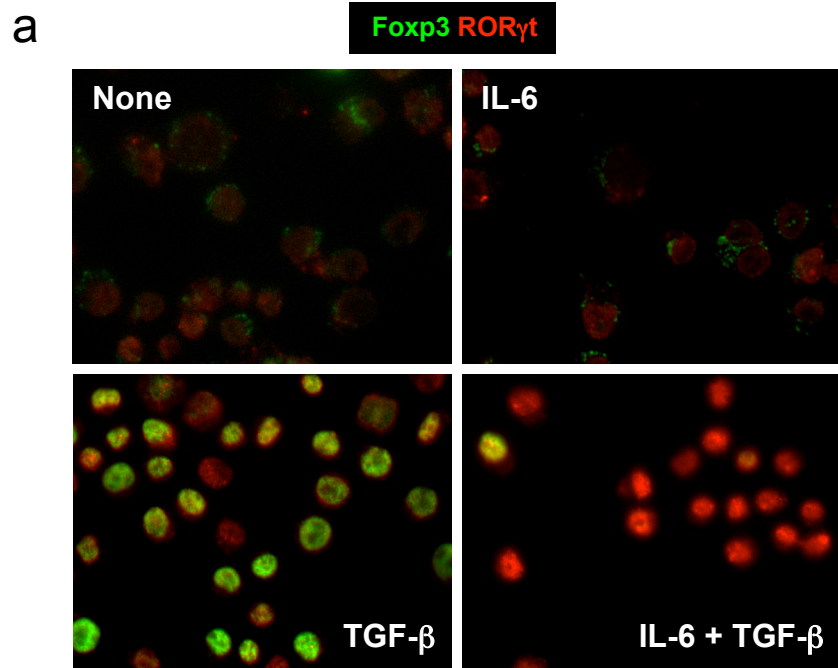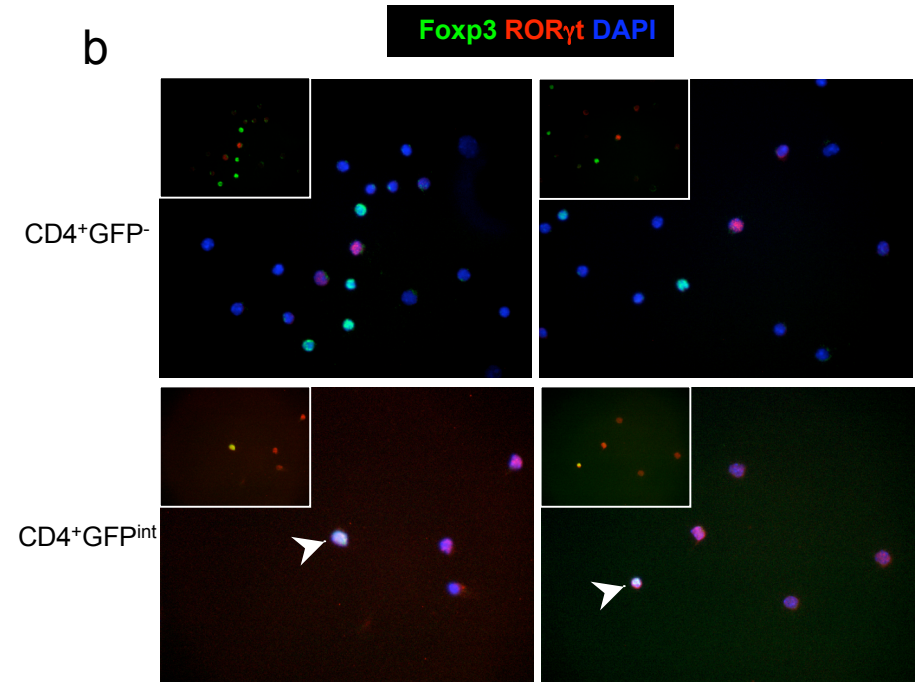

# Supplementary Figure 2

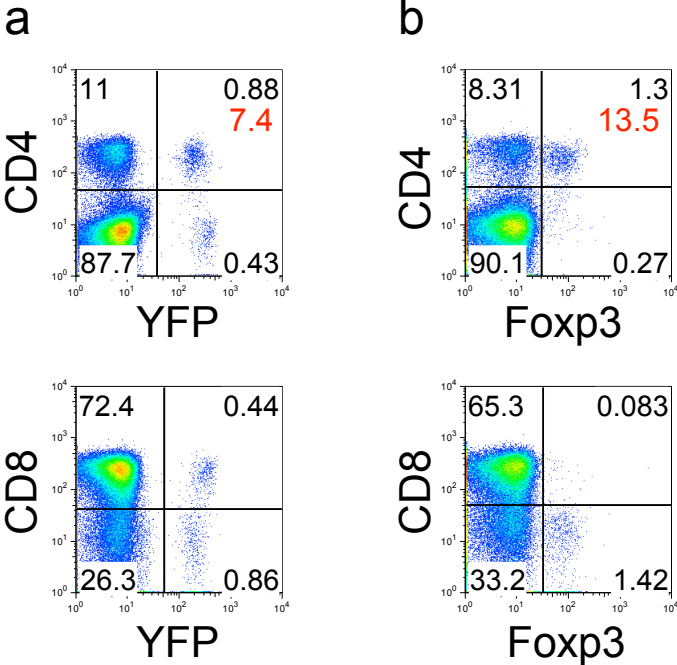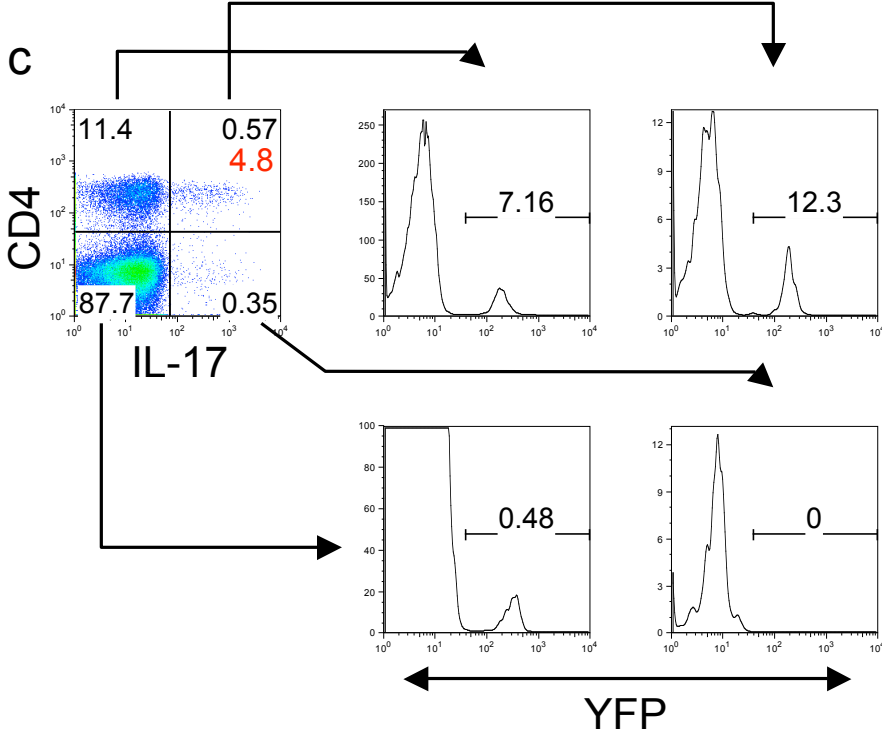

# Supplementary Figure 3

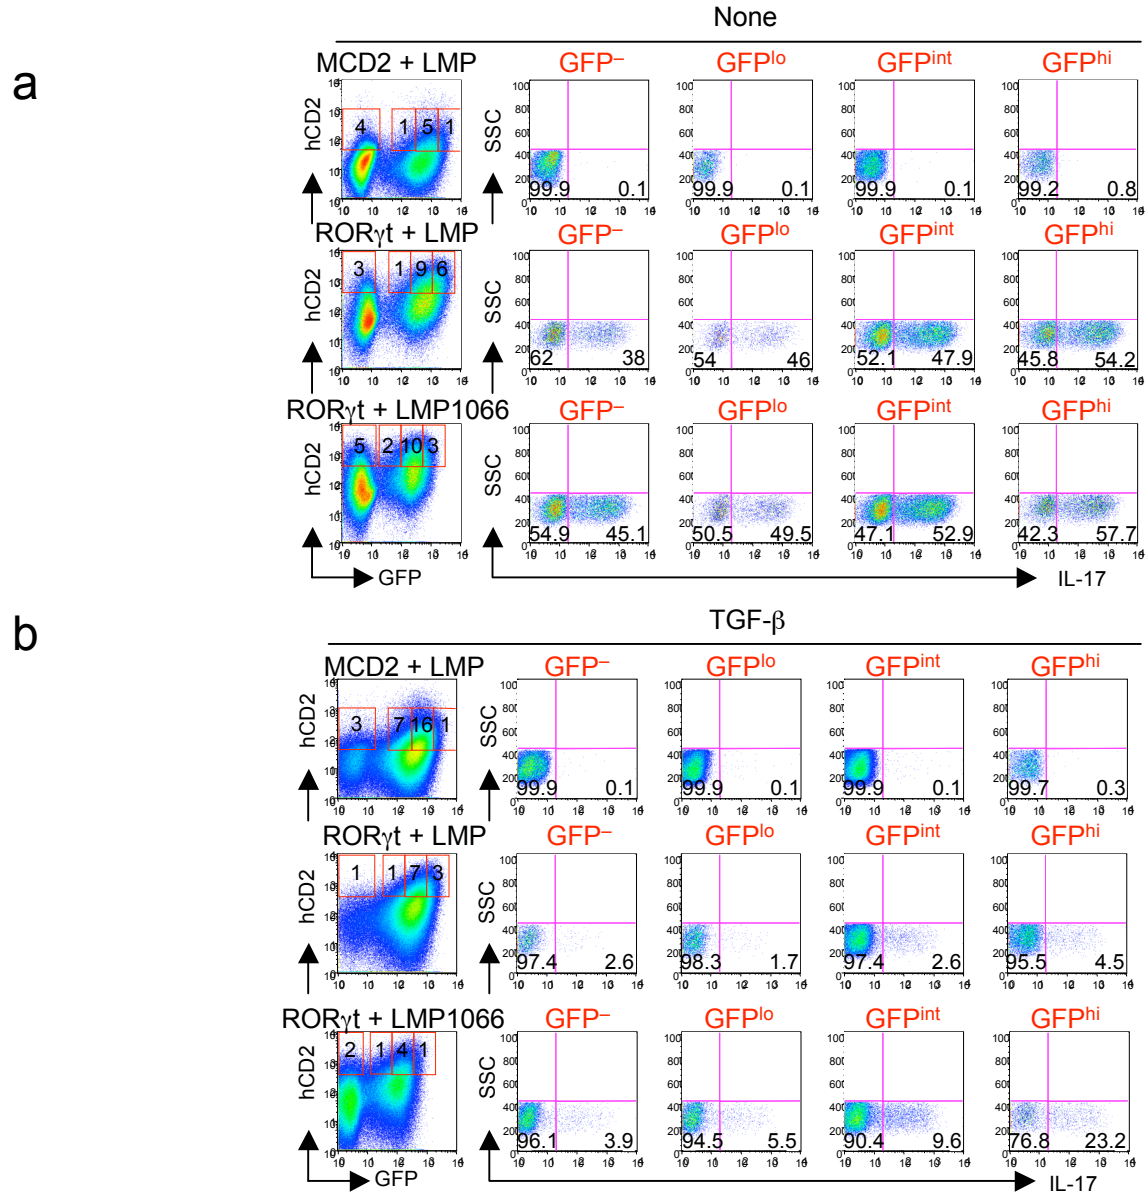

# Supplementary Figure 4

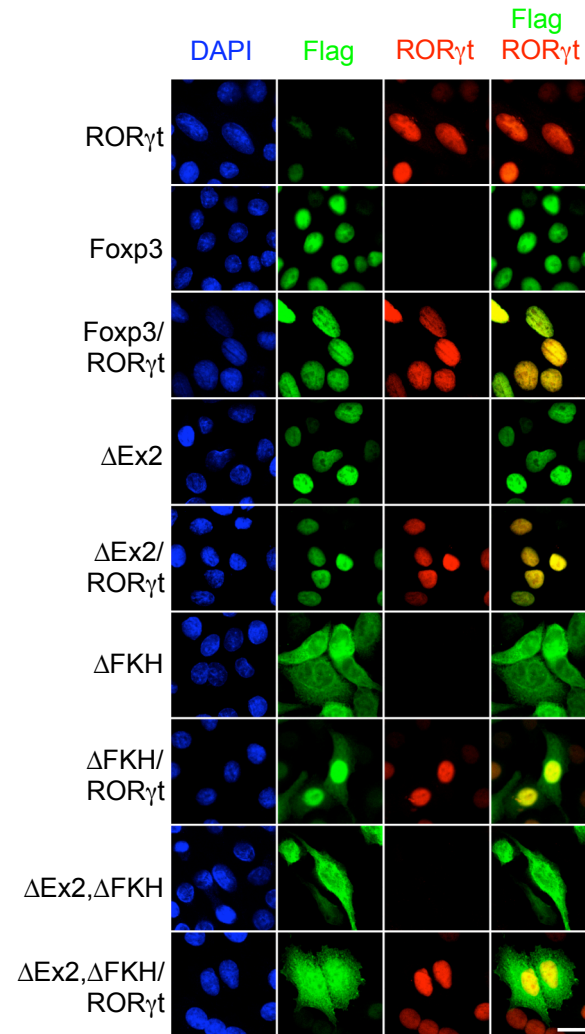

# Supplementary Figure 5

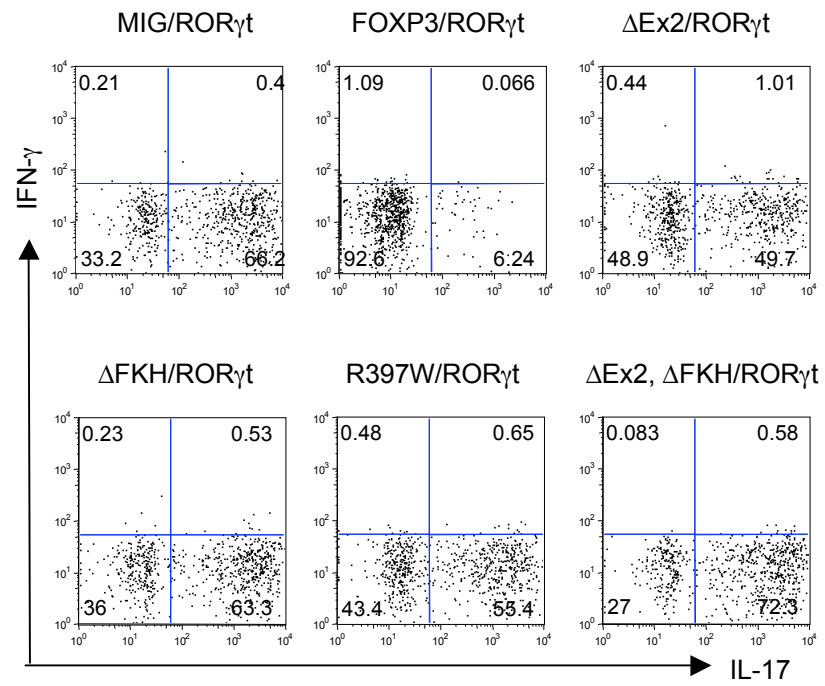

# Supplementary Figure 6

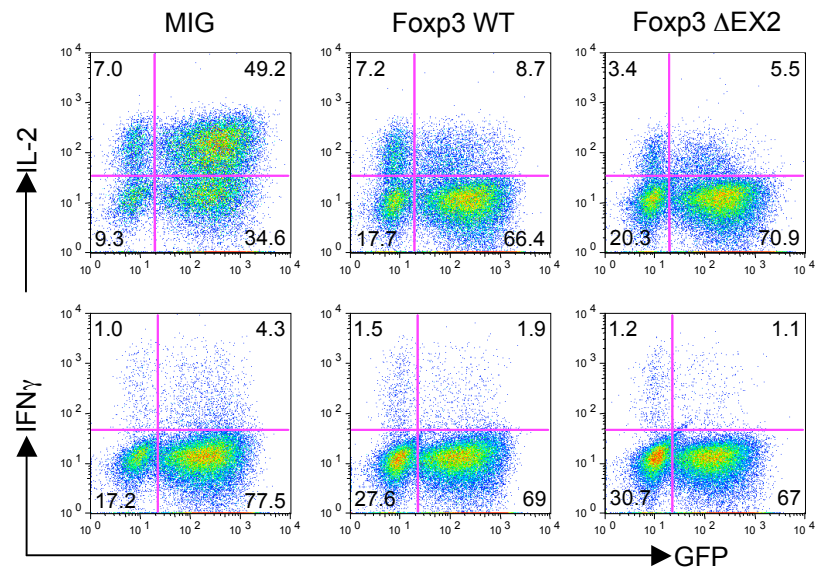

# Supplementary Figure 7

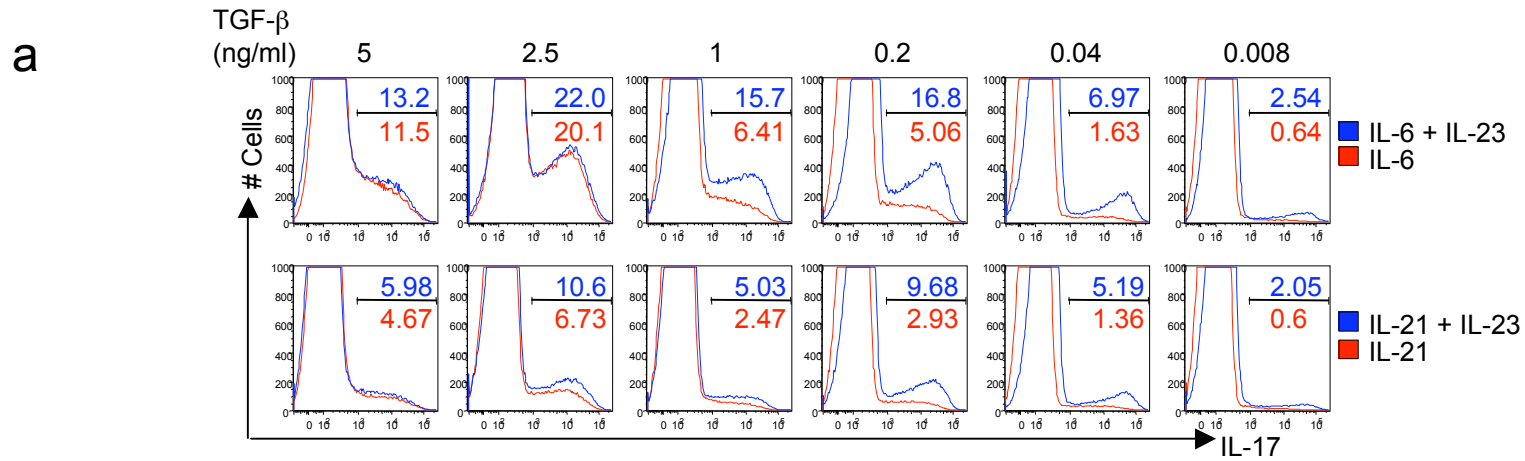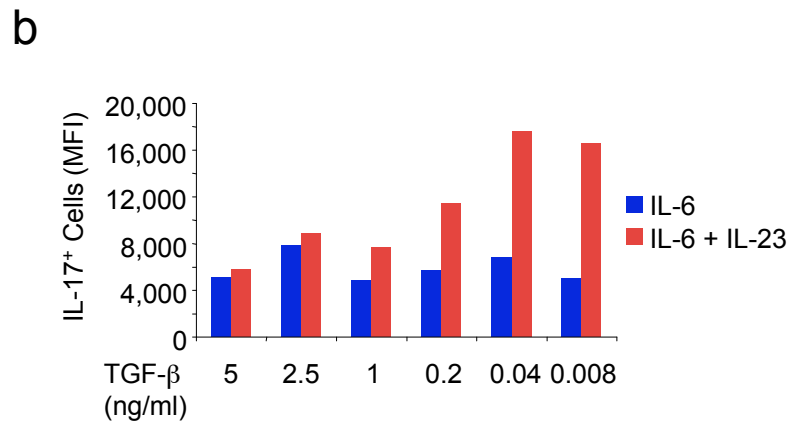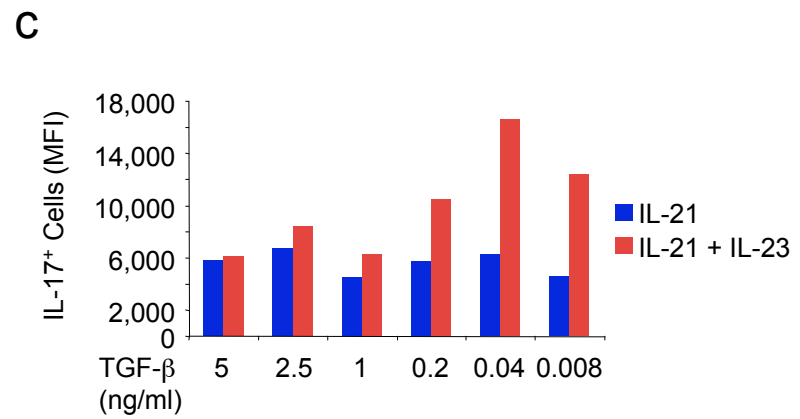

# Supplementary Figure 8

a

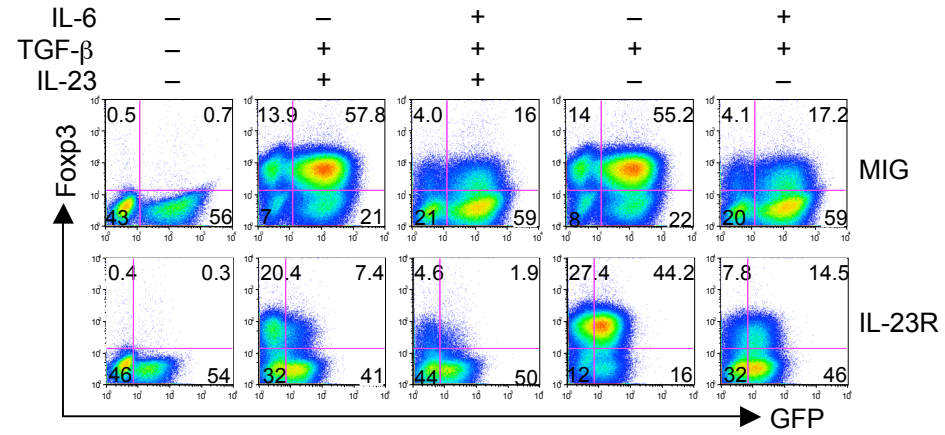

b

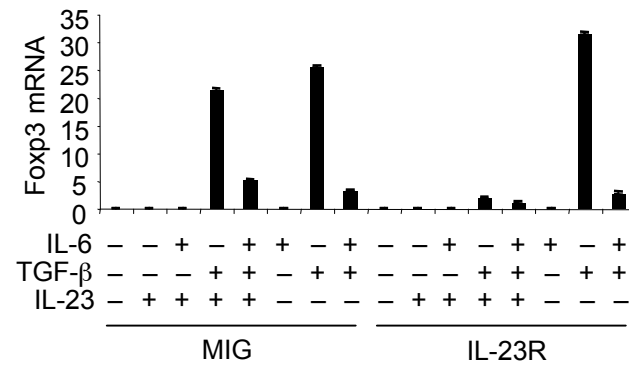



# Supplementary Figure 9

a

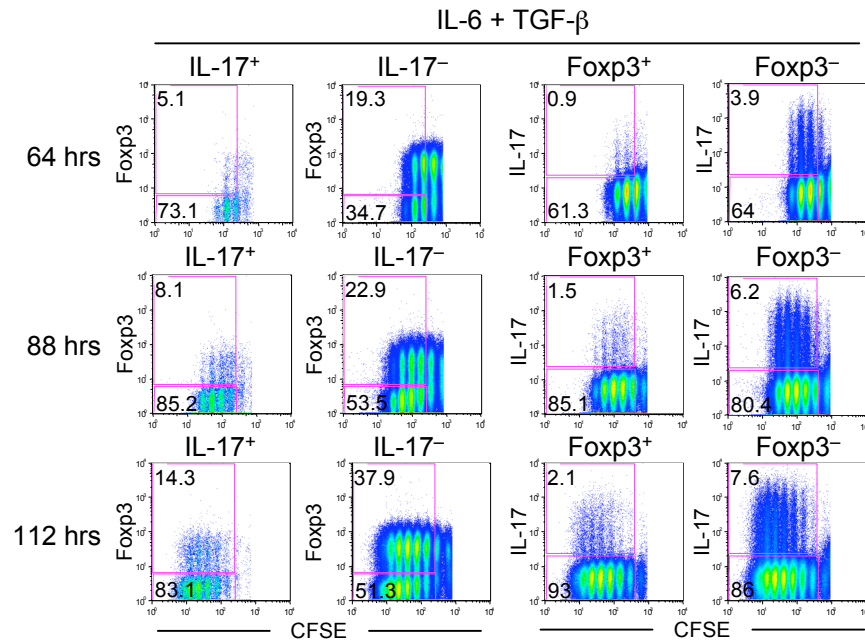

b

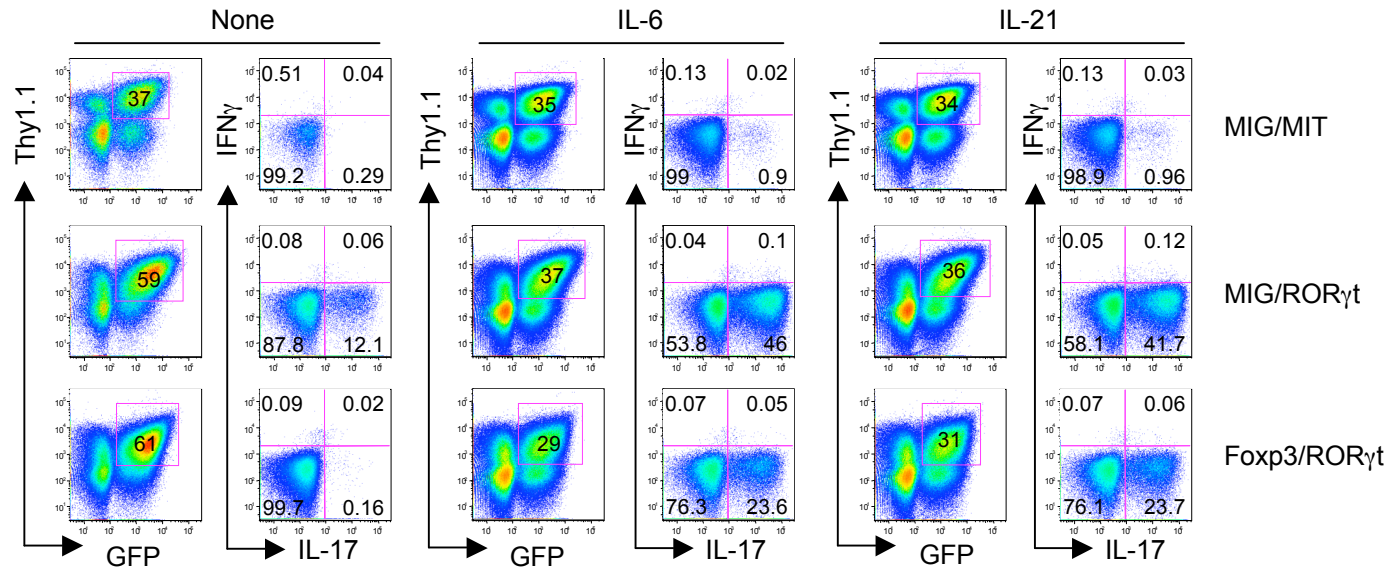

Supplementary Figure 10

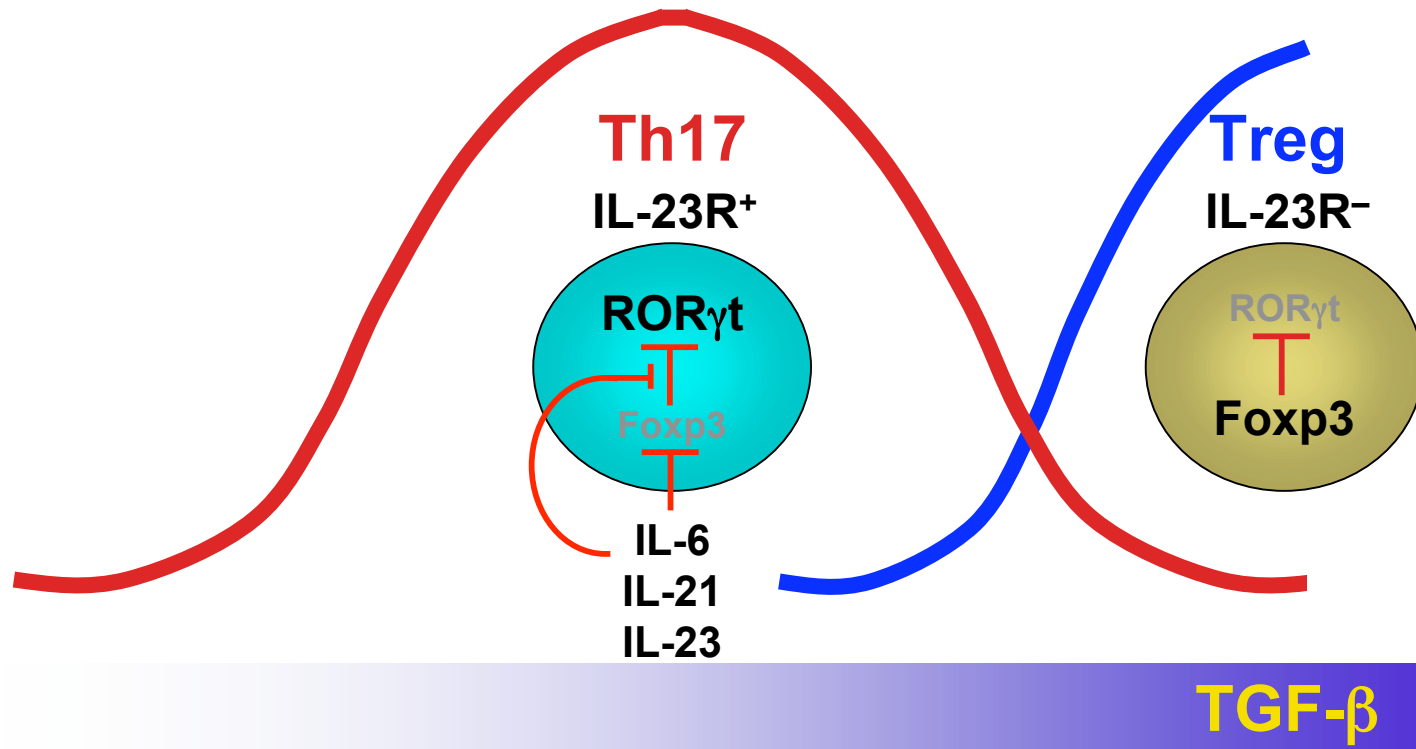

Supplement: NIHMS62280-supplement-Supp_Figs.pdf [file NIHMS62280-supplement-Supp_Figs.pdf]
